# Supplementary material for: ADAM-like Decysin-1 (ADAMDEC1) is a positive regulator of Epithelial Defense Against Cancer (EDAC) that promotes apical extrusion of RasV12-transformed cells
Source: Sci Rep. 2018 Jun 25;8:9639. doi: 10.1038/s41598-018-27469-z (PMC6018119; doi:10.1038/s41598-018-27469-z)
Supplement: Supplementary file 2 — Supplementary Table 1 [file 41598_2018_27469_MOESM2_ESM.xlsx]

## Sheet: CT value
Supplementary Table 1
CT value
ADAMDEC1	MDCK only control	1:1 mix control	Ras only control	MDCK-shADAMDEC1 only	ADAM:Ras=1:1 mix	MDCK only CAPE	1:1 mix CAPE	Ras only CAPE
No.1	30.2055	29.5296	30.0954	-	-	34.0715	33.8212	33.8196
No.2	30.2768	29.5506	30.3594	-	-	33.1976	33.8068	33.4871
No.3	32.8782	31.8157	32.4761	-	-	34.833	33.467	34.6782
No.4	36.5532	34.7493	35.2571	-	-	not detectable	not detectable	not detectable
No.5	30.1138	29.6596	32.2348	-	-	33.6469	33.3606	31.9922
No.6	30.2989	29.8978	31.7442	46.9282	34.5443	-	-	-
No.7	29.2169	29.6661	32.8896	33.8306	33.1868	-	-	-
No.8	29.6627	28.639	32.2848	34.236	33.1868	-	-	-
GAPDH	MDCK only control	1:1 mix control	Ras only control	MDCK-shADAMDEC1 only	ADAM:Ras=1:1 mix	MDCK only CAPE	1:1 mix CAPE	Ras only CAPE
No.1	25.3662	24.7629	23.9721	-	-	23.6661	23.8793	24.0045
No.2	26.9005	26.7126	26.5475	-	-	25.6372	25.9017	25.9333
No.3	24.8791	24.6397	24.608	-	-	24.3666	24.2875	24.465
No.4	26.9596	26.6973	26.7514	-	-	28.4745	26.4903	26.7783
No.5	25.9681	25.7732	26.027	-	-	25.6112	25.757	25.5405
No.6	24.6815	24.3538	24.4305	24.7183	24.751	-	-	-
No.7	25.8545	25.7407	25.7865	26.322	25.9688	-	-	-
No.8	26.2221	26.0337	25.7929	26.2122	25.8915	-	-	-
ACTB	MDCK only control	1:1 mix control	Ras only control	MDCK-shADAMDEC1 only	ADAM:Ras=1:1 mix	MDCK only CAPE	1:1 mix CAPE	Ras only CAPE
No.1	-	-	-	-	-	-	-	-
No.2	-	-	-	-	-	-	-	-
No.3	17.672	16.6107	16.2367	-	-	18.1141	16.9646	16.2997
No.4	19.936	19.4342	18.8203	-	-	22.7251	19.6804	19.349
No.5	17.9706	17.5718	16.9276	-	-	18.2545	17.8796	17.1019
No.6	17.5999	16.3853	15.8681	18.3139	17.7024	-	-	-
No.7	17.3267	16.4207	15.9215	17.5694	16.7277	-	-	-
No.8	18.6132	17.2375	16.5363	19.1816	17.3939	-	-	-
